# Supplementary material for: Bifunctional Fe(ii) spin crossover-complexes based on ω-(1H-tetrazol-1-yl) carboxylic acids
Source: Royal Society of Chemistry journal article supplement (doi:10.1039/d0dt03315d), 2020-01-01
Supplement: d0dt03315d1.pdf [file d0dt03315d1.pdf]

## Supporting Information

### Bifunctional Fe(II) spin crossover-complexes based on $\omega$ -(1*H*-tetrazol-1-yl) carboxylic acids

Willi Zeni,<sup>a</sup> Marco Seifried,<sup>a</sup> Christian Knoll,<sup>a</sup> Jan M. Welch,<sup>b</sup> Gerald Giester,<sup>c</sup> Berthold Stöger,<sup>d</sup> Werner Artner,<sup>d</sup> Michael Reissner,<sup>e</sup> Danny Müller,<sup>a\*</sup> and Peter Weinberger<sup>a\*</sup>

---

<sup>a</sup> Institute of Applied Synthetic Chemistry, TU Wien, Getreidemarkt 9/163-AC, 1060 Vienna, Austria

E-mail: danny.mueller@tuwien.ac.at; peter.e163.weinberger@tuwien.ac.at

<sup>b</sup> Center for Labelling and Isotope Production, TRIGA Center Atominstut, TU Wien, Stadionallee 2, 1020 Vienna, Austria.

<sup>c</sup> Department of Mineralogy and Crystallography, University of Vienna, Althanstraße 14 (UZA 2), 1090 Vienna, Austria.

<sup>d</sup> X-Ray Center, TU Wien, Getreidemarkt 9, 1060 Vienna, Austria

<sup>e</sup> Institute of Solid State Physics, TU Wien, Wiedner Hauptstraße 8-10/138, 1040 Vienna, Austria

- 
- Fe-N bond lengths for **4, 6, 7, 9**
  - DSC / TGA data for **1, 2, 3**

Table S1. Bond-lengths for  $[\text{Fe}(\text{2COOHTz})_6](\text{BF}_4)_2 \cdot 2 \text{ MeCN}$  (**4**) in HS and LS state

|                   | <b>4</b> , HS [Å] | <b>4</b> , LS [Å] |
|-------------------|-------------------|-------------------|
| Fe-N <sub>4</sub> | 2.176             | 1.987             |

Table S2. Bond-lengths for  $[\text{Fe}(\text{4COOHTz})_6](\text{BF}_4)_2 \cdot \text{Et}_2\text{O}$  (**6**) in HS and LS state

|                    | <b>6</b> , HS [Å] | <b>6</b> , LS [Å] |
|--------------------|-------------------|-------------------|
| Fe-N <sub>4</sub>  | 2.165             | 1.969             |
| Fe-N <sub>4A</sub> | 2.182             | 1.979             |
| Fe-N <sub>4B</sub> | 2.185             | 1.981             |

Table S3. Bond-lengths for  $[\text{Fe}(\text{2COOHTz})_6](\text{ClO}_4)_2 \cdot 2 \text{ MeCN}$  (**7**) in HS and LS state

|                   | <b>7</b> , HS [Å] | <b>7</b> , LS [Å] |
|-------------------|-------------------|-------------------|
| Fe-N <sub>4</sub> | 2.184             | 2.004             |

Table S4. Bond-lengths for  $[\text{Fe}(\text{4COOHTz})_6](\text{ClO}_4)_2 \cdot \text{Et}_2\text{O}$  (**9**) in HS and LS state

|                                  | <b>9</b> , HS [Å] | <b>9</b> , LS [Å] |
|----------------------------------|-------------------|-------------------|
| Fe <sub>1</sub> -N <sub>4</sub>  | 2.181             | 1.984             |
| Fe <sub>1</sub> -N <sub>4A</sub> | 2.176             | 1.987             |
| Fe <sub>1</sub> -N <sub>4B</sub> | 2.173             | 1.992             |
| Fe <sub>2</sub> -N <sub>4C</sub> | 2.174             | 1.987             |
| Fe <sub>2</sub> -N <sub>4D</sub> | 2.185             | 1.997             |
| Fe <sub>2</sub> -N <sub>4E</sub> | 2.176             | 1.984             |

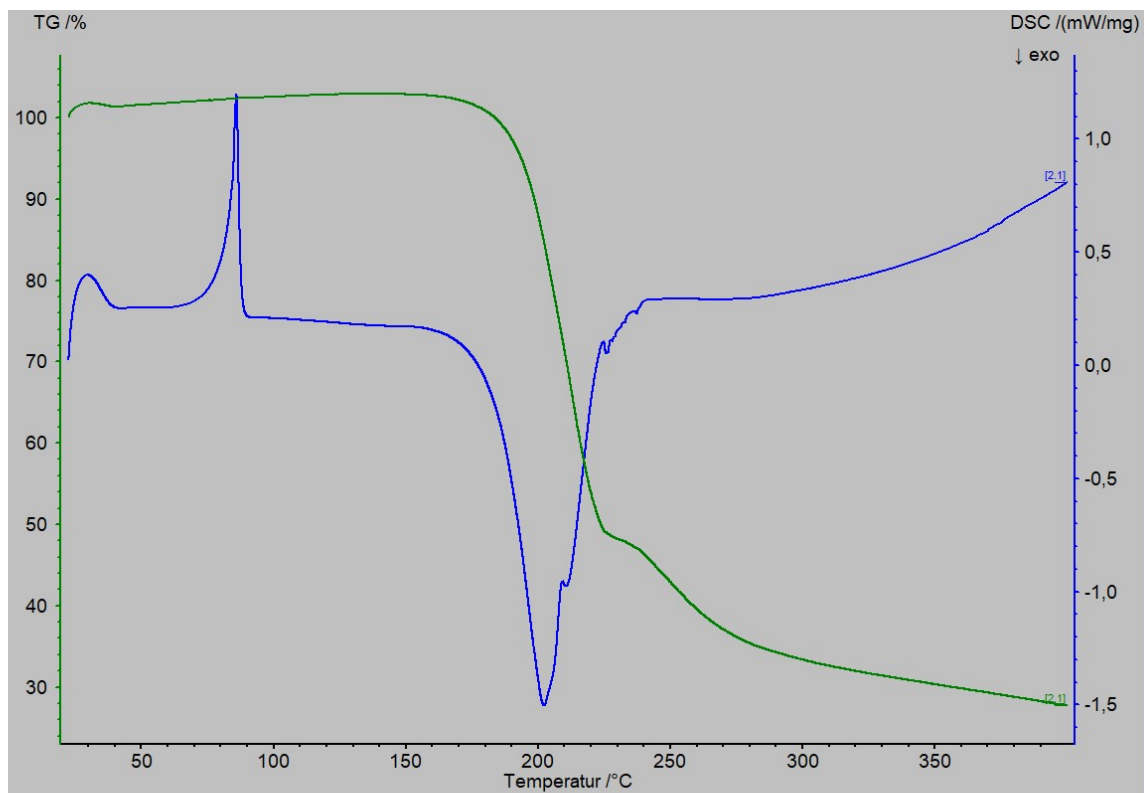

Figure S1. DSC / TGA analysis for 2COOHTz (1)

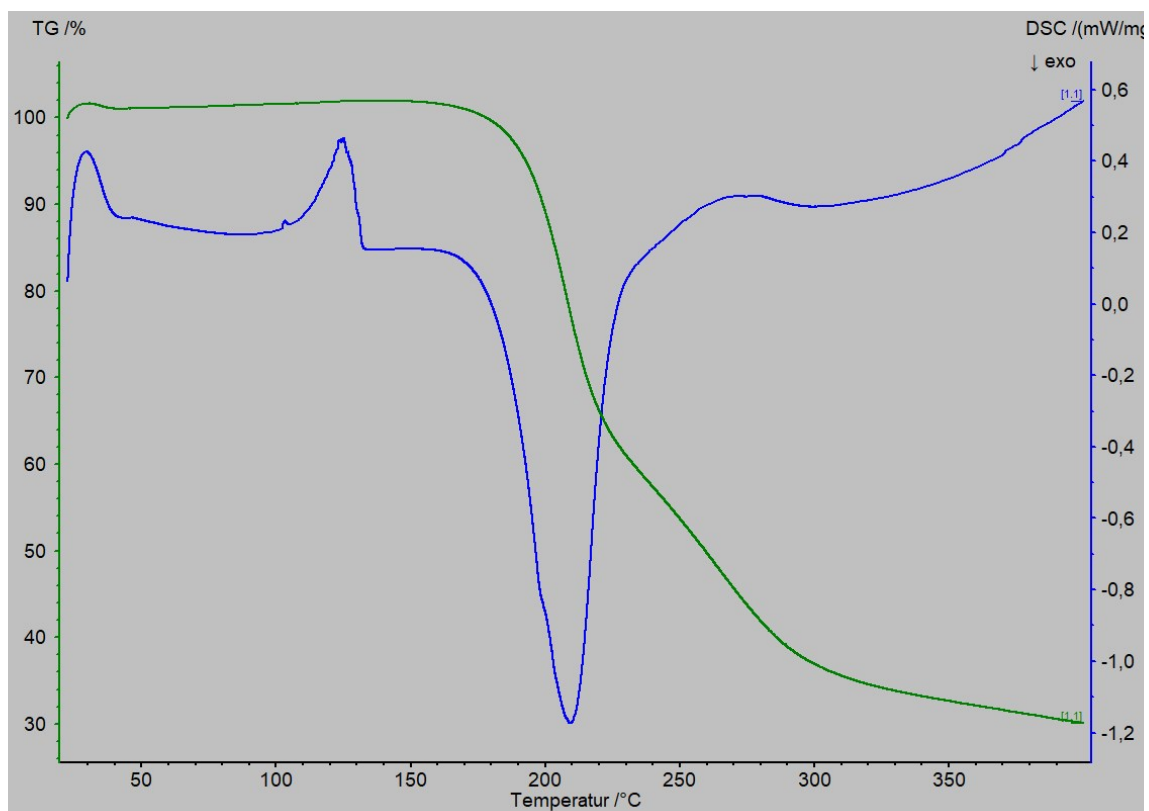

Figure S2. DSC / TGA analysis for 3COOHTz (2)

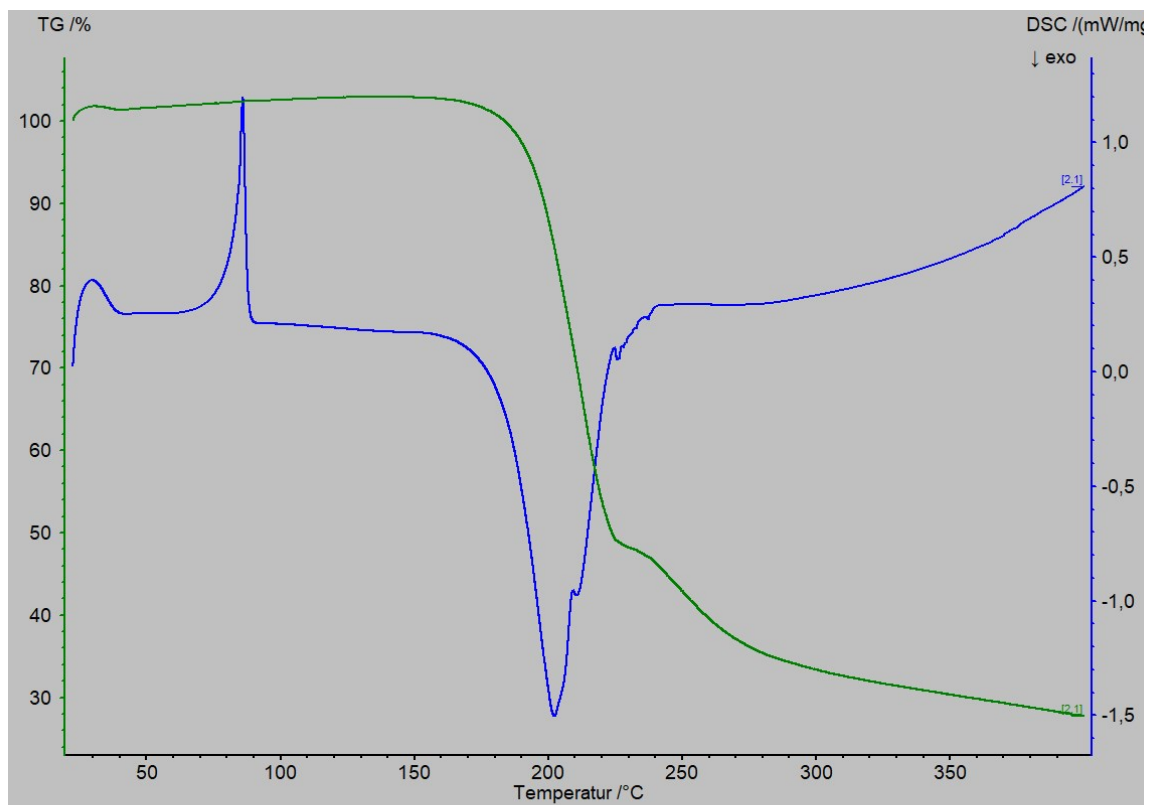

Figure S3. DSC / TGA analysis for 4COHTz (**3**)
